# Supplementary material for: Syndecan-1 shedding destroys epithelial adherens junctions through STAT3 after renal ischemia/reperfusion injury
Source: PubMed Central journal article supplement — iScience. 2023 Oct 14;26(11):108211. doi: 10.1016/j.isci.2023.108211 (PMC10628745; doi:10.1016/j.isci.2023.108211), 2023-10-14

iScience, Volume 26

## **Supplemental information**

### **Syndecan-1 shedding destroys epithelial adherens junctions through STAT3 after renal ischemia/reperfusion injury**

**Man Guo, Daoqi Shen, Yiqi Su, Jiarui Xu, Shuan Zhao, Weidong Zhang, Yaqiong Wang, Wuhua Jiang, Jialin Wang, Xuemei Geng, Xiaoqiang Ding, and Xialian Xu**

## Supplementary Information

### Contents

Figure S1: GM6001 pre-treatment had no influence on the renal function of sham mice

Figure S2: The identify of wild-type (SDC-1<sup>fl/fl</sup>/Cre<sup>-</sup>) mice and tubule-specific knockout mice (SDC-1<sup>fl/fl</sup>/Cre<sup>+</sup>)

Figure S3: The marker of primary mouse proximal tubular cells

Figure S4: S3I-201 could inhibited the expression of phosphorylated STAT3

Figure S5: The mRNA expression of SDC-1 in MDCK cells after being knock-down. by the SiRNA



**Supplemental Figure 2. The identify of wild-type (SDC-1<sup>fl/fl</sup>/Cre<sup>-</sup>) mice and tubule-specific knockout mice (SDC-1<sup>fl/fl</sup>/Cre<sup>+</sup>). Related to Figure 3.** (A) Construction method of tubule-specific knockout SDC-1 mice. (B) The mice tail DNA were validated by PCR results. The PCR product of SDC-1<sup>fl/fl</sup> mice was 401 bp, wild type was 335 bp, heterozygous type was 401 bp and 335 bp. The PCR product of CDH16-Cre was 420 bp, and the PCR product of internal positive control was 200 bp. We took the genotypes of mice 302, 314, 303 and 315 as examples: The genotypes of mice 302, 303 and 315 were SDC-1<sup>fl/fl</sup>, and the genotypes of mice 303 and 315 were CDH16-Cre. Therefore, the genotypes of mice 303 and 315 were SDC-1<sup>fl/fl</sup>/Cre<sup>+</sup>. (C) Expression levels of SDC-1 mRNA in renal cortex and medulla of knockout mice, n=1. (D) Expression level of SDC-1 mRNA in heart, liver, spleen and lung of knockout mice, n=1. (E) Protein expression level of SDC-1 in renal cortex and medulla of knockout mice, n=1.

**A** SDC-1<sup>fl/fl</sup> × CDH16-Cre

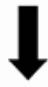

SDC-1<sup>fl/fl</sup>/Cre<sup>+</sup>

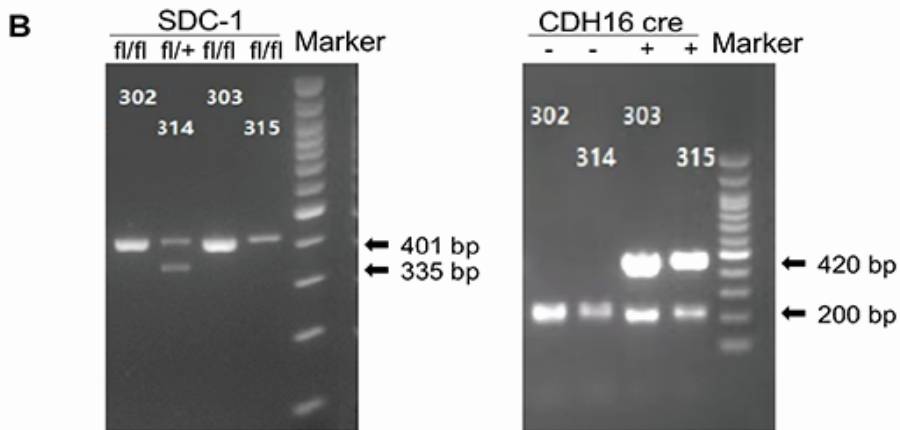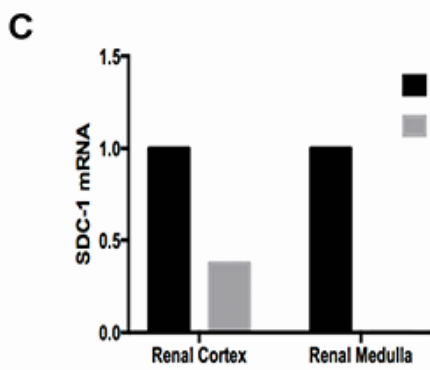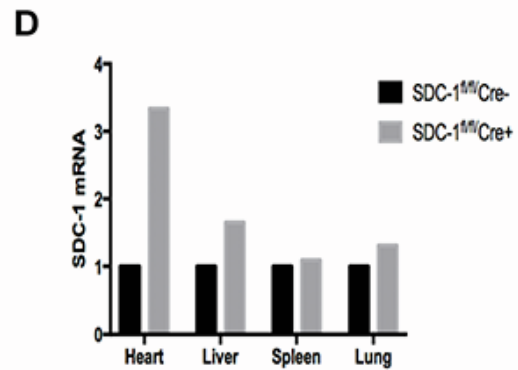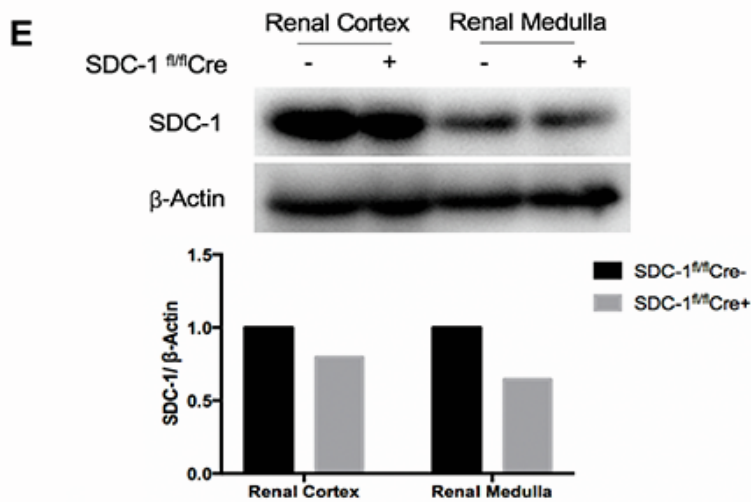

**Supplemental Figure 3. The marker of primary mouse proximal tubular cells.**  
**Related to Figure 3. Related to STAR Methods (EXPERIMENTAL MODEL AND**  
**STUDY PARTICIPANT DETAILS).** We used AQP1 to mark the proximal tubule.  
Bar=50  $\mu$ m.

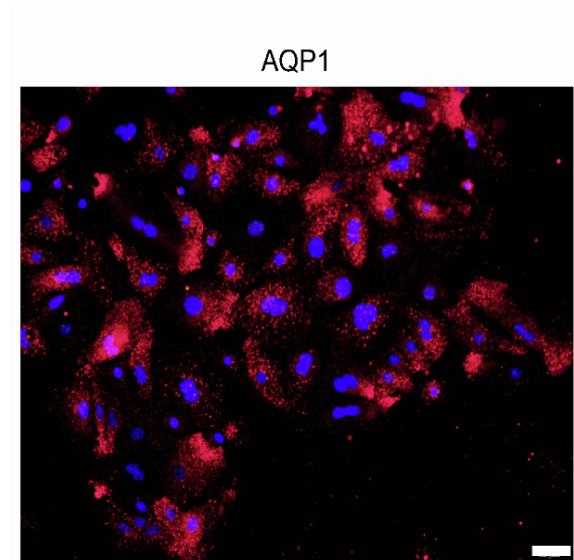

**Supplemental Figure 4. S3I-201 could inhibited the expression of phosphorylated STAT3. Related to Figure 4.** The activation of STAT3 could be inhibited by S3I-201 efficiently at 5 $\mu$ M in the H/R treated PTECs. \*P<0.05 vs DMSO+H/R group. n=3-4.

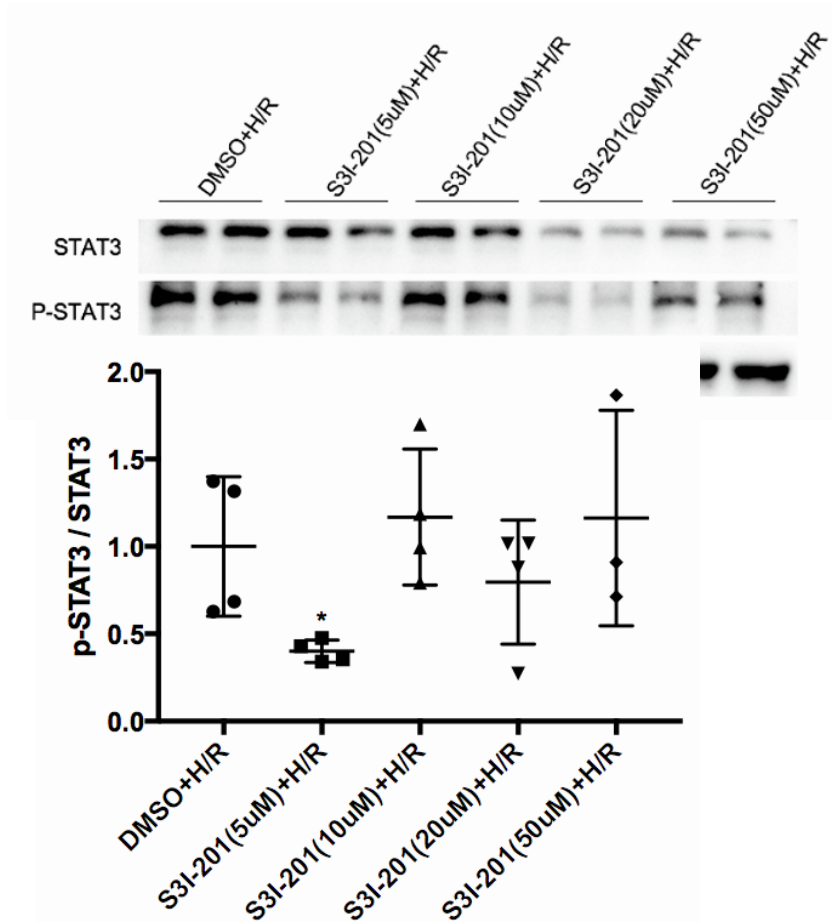

**Supplemental Figure 5. The mRNA expression of SDC-1 in MDCK cells after being knock-down by the SiRNA. Related to Figure 5.** MDCK cells were transfected with negative SiRNA (Si-NC) or SDC-1 knockdown SiRNA (Si-SDC-1). **\*\* $P < 0.01$**  compared with Si-NC group, n=3.

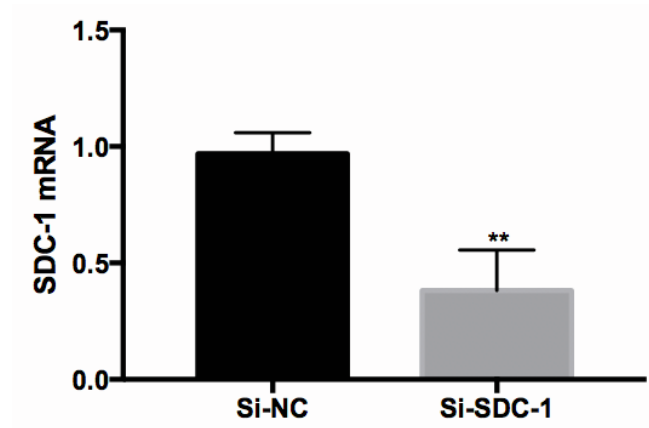

Supplement: mmc1.pdf [file mmc1.pdf]
